# Supplementary material for: Multi-omics approach highlights differences between RLP classes in Arabidopsis thaliana
Source: PubMed Central journal article supplement (PMC8290556; doi:10.1186/s12864-021-07855-0), 2021-07-20
Supplement: 12864_2021_7855_MOESM2_ESM.pdf [file 12864_2021_7855_MOESM2_ESM.pdf]

| single genes |           | paired genes |           | higher order groups |           |
|--------------|-----------|--------------|-----------|---------------------|-----------|
| RLP          | ATG       | RLP          | ATG       | RLP                 | ATG       |
| AtRLP1       | AT1G07390 | AtRLP2       | AT1G17240 | AtRLP8              | AT1G54480 |
| AtRLP17      | AT1G80080 | AtRLP3       | AT1G17250 | AtRLP9              | AT1G58190 |
| AtRLP29      | AT2G42800 | AtRLP4       | AT1G28340 | AtRLP10             | AT1G65380 |
| AtRLP36      | AT3G23010 | AtRLP5       | AT1G34290 | AtRLP13             | AT1G74170 |
| AtRLP39      | AT3G24900 | AtRLP6       | AT1G45616 | AtRLP14             | AT1G74180 |
| AtRLP43      | AT3G28890 | AtRLP7       | AT1G47890 | AtRLP15             | AT1G74190 |
| AtRLP44      | AT3G49750 | AtRLP11      | AT1G71390 | AtRLP16             | AT1G74200 |
| AtRLP45      | AT3G53240 | AtRLP12      | AT1G71400 | AtRLP24             | AT2G33020 |
| AtRLP46      | AT4G04220 | AtRLP18      | AT2G15040 | AtRLP25             | AT2G33030 |
| AtRLP51      | AT4G18760 | AtRLP19      | AT2G15080 | AtRLP26             | AT2G33050 |
| AtRLP52      | AT5G25910 | AtRLP20      | AT2G25440 | AtRLP27             | AT2G33060 |
| AtRLP53      | AT5G27060 | AtRLP21      | AT2G25470 | AtRLP28             | AT2G33080 |
| AtRLP54      | AT5G40170 | AtRLP22      | AT2G32660 | AtRLP40             | AT3G24982 |
| AtRLP55      | AT5G45770 | AtRLP23      | AT2G32680 | AtRLP41             | AT3G25010 |
| AtRLP56      | AT5G49290 | AtRLP30      | AT3G05360 | AtRLP42             | AT3G25020 |
| AtRLP57      | AT5G65830 | AtRLP31      | AT3G05370 | AtRLP47             | AT4G13810 |
|              |           | AtRLP32      | AT3G05650 | AtRLP48             | AT4G13880 |
|              |           | AtRLP33      | AT3G05660 | AtRLP50             | AT4G13920 |
|              |           | AtRLP34      | AT3G11010 |                     |           |
|              |           | AtRLP35      | AT3G11080 |                     |           |
|              |           | AtRLP37      | AT3G23110 |                     |           |
|              |           | AtRLP38      | AT3G23120 |                     |           |

Figure S2: Genomic organization of RLPs in Arabidopsis.
