# Supplementary material for: Multi-omics approach highlights differences between RLP classes in Arabidopsis thaliana
Source: PubMed Central journal article supplement (PMC8290556; doi:10.1186/s12864-021-07855-0), 2021-07-20
Supplement: 12864_2021_7855_MOESM4_ESM.pdf [file 12864_2021_7855_MOESM4_ESM.pdf]

Table S1: Hypothetical PRRs with associated pathogens that might harbour an immunogenic motif, which is recognized by the respective RLP.

| RLP      | pathogen                              | genera   |
|----------|---------------------------------------|----------|
| RLP12    | <i>Plectosphaerella cucumerina</i>    | fungus   |
|          | <i>Botrytis cinerea</i>               | fungus   |
|          | <i>Blumeria graminis</i>              | fungus   |
| RLP19    | <i>Blumeria graminis</i>              | fungus   |
|          | <i>Plectosphaerella cucumerina</i>    | fungus   |
|          | <i>Phytophthora infestans</i>         | oomycete |
|          | <i>Botrytis cinerea</i>               | fungus   |
| RLP27    | <i>Pseudomonas syringae</i>           | bacteria |
| RLP35    | <i>Botrytis cinerea</i>               | fungus   |
|          | <i>Colletotrichum incanum</i>         | fungus   |
|          | <i>Pseudomonas syringae</i>           | bacteria |
| RLP37/38 | <i>Blumeria graminis</i>              | fungus   |
|          | <i>Erysiphe cichoracearum</i>         | fungus   |
|          | <i>Hyaloperonospora arabidopsidis</i> | oomycete |
|          | <i>Colletotrichum incanum</i>         | fungus   |
| RLP40    | <i>Pseudomonas syringae</i>           | bacteria |
|          | <i>Blumeria graminis</i>              | fungus   |
| RLP41    | <i>Erysiphe cichoracearum</i>         | fungus   |
|          | <i>Golovinomyces/Erysiphe orontii</i> | fungus   |
|          | <i>Plectosphaerella cucumerina</i>    | fungus   |
|          | <i>Sclerotinia sclerotiorum</i>       | fungus   |
|          | Turnip mosaic virus                   | virus    |
| RLP50    | <i>Blumeria graminis</i>              | fungus   |
|          | <i>Golovinomyces/Erysiphe orontii</i> | fungus   |
|          | <i>Pseudomonas syringae</i>           | bacteria |
|          | <i>Sclerotinia sclerotiorum</i>       | fungus   |
| RLP54    | <i>Botrytis cinerea</i>               | fungus   |
|          | <i>Pseudomonas syringae</i>           | bacteria |
